# Supplementary material for: Ternary structure reveals mechanism of a membrane diacylglycerol kinase
Source: Springer Nature journal article supplement (doi:10.1038/ncomms10140), 2015-12-17
Supplement: ncomms10140-s1.pdf [file ncomms10140-s1.pdf]

Ternary structure reveals mechanism of a membrane diacylglycerol kinase | Nature Communications


Skip to main content

Thank you for visiting nature.com. You are using a browser version with limited support for CSS. To obtain
the best experience, we recommend you use a more up to date browser (or turn off compatibility mode in
Internet Explorer). In the meantime, to ensure continued support, we are displaying the site without styles
and JavaScript.

Advertisement

- View all journals
- Search
- My Account

  Login

- Explore content
- About the journal
- Publish with us

- Sign up for alerts
- RSS feed


1. nature
2. nature communications
3. articles
4. article

Ternary structure reveals mechanism of a membrane diacylglycerol kinase

Download PDF

Download PDF

- Article
- Open access
- Published: 17 December 2015

# Ternary structure reveals mechanism of a membrane diacylglycerol kinase

- Dianfan Li1nAff11,
- Phillip J. Stansfeld2,
- Mark S. P. Sansom2,
- Aaron Keogh1,
- Lutz Vogeley1,
- Nicole Howe1,
- Joseph A. Lyons1nAff12,
- David Aragao1nAff13,
- Petra Fromme3,
- Raimund Fromme3,
- Shibom Basu3,
- Ingo Grotjohann3,
- Christopher Kupitz3,
- Kimberley Rendek3,
- Uwe Weierstall4,
- Nadia A. Zatsepin4,
- Vadim Cherezov5,
- Wei Liu3,
- Sateesh Bandaru6,
- Niall J. English6,
- Cornelius Gati7,
- Anton Barty7,
- Oleksandr Yefanov7,
- Henry N. Chapman7,8,
- Kay Diederichs9,
- Marc Messerschmidt10nAff14,
- Sébastien Boutet10,
- Garth J. Williams10,
- M. Marvin Seibert10nAff15 &
- …
- Martin Caffrey1

Show authors

*Nature Communications*
**volume 6**, Article number: 10140 (2015)
Cite this article

- 6637 Accesses
- 25 Citations
- 115 Altmetric
- Metrics details

### Subjects

- Enzyme mechanisms
- Kinases
- Molecular biophysics
- Structural biology

## Abstract

Diacylglycerol kinase catalyses the ATP-dependent conversion of diacylglycerol to phosphatidic acid in the plasma membrane of *Escherichia coli*. The small size of this integral membrane trimer, which has 121 residues per subunit, means that available protein must be used economically to craft three catalytic and substrate-binding sites centred about the membrane/cytosol interface. How nature has accomplished this extraordinary feat is revealed here in a crystal structure of the kinase captured as a ternary complex with bound lipid substrate and an ATP analogue. Residues, identified as essential for activity by mutagenesis, decorate the active site and are rationalized by the ternary structure. The γ-phosphate of the ATP analogue is positioned for direct transfer to the primary hydroxyl of the lipid whose acyl chain is in the membrane. A catalytic mechanism for this unique enzyme is proposed. The active site architecture shows clear evidence of having arisen by convergent evolution.


### Similar content being viewed by others

### Structure and catalytic mechanism of a human triacylglycerol-synthesis enzyme

Article
13 May 2020

Xuewu Sui, Kun Wang, … Robert V. Farese Jr

### Structural anatomy of Protein Kinase C C1 domain interactions with diacylglycerol and other agonists

Article
Open access
16 May 2022

Sachin S. Katti, Inna V. Krieger, … Tatyana I. Igumenova

### Structure and mechanism of human diacylglycerol O-acyltransferase 1

Article
13 May 2020

Lie Wang, Hongwu Qian, … Ming Zhou

## Introduction

Diacylglycerol kinase (DgkA) is the smallest known kinase. In *Escherichia coli*, it is responsible for the adenosine triphosphate (ATP)-dependent phosphorylation of diacylglycerol (DAG) to phosphatidic acid used in periplasm membrane-derived oligosaccharide synthesis in response to osmotic shock1. The enzyme has long served as a model for integral membrane enzymology1,2,3, folding4,5,6, assembly7,8,9 and stability10,11. It is a trimer with three active sites of the shared sites type that exhibits moderate positive heteroallostery, random-binding kinetics and lipid substrate promiscuity1.

High-resolution X-ray structures of wild-type (WT) and functional thermostable mutants (Δ4, Δ7) of DgkA were obtained using protein crystallized in a membrane environment by the lipid cubic phase (LCP) or *in meso* method12. In contrast to a solution NMR structure that displayed domain swapping13, the crystallized kinase showed a simple quaternary arrangement in which adjacent monomers created shared active sites. Considerable effort was devoted to demonstrating that the enzyme was functionally active in the crystal12. While the model included a lipid substrate, a monoacylglycerol (7.8 MAG), its functional relevance remained uncertain in the absence of a nucleotide bound structure. Here we report such a structure, along with mutagenesis studies, molecular dynamics simulations (MDS) and density functional theory (DFT) modelling, which explain a wealth of biochemical and biophysical data and support a mechanism for direct transphosphorylation by this diminutive kinase.

## Results

### Crystallization and overall structure

Because DgkA was crystallized in the LCP composed of MAGs (ref. 14), which double as lipid substrates15, solving a structure with ATP bound was impossible – the enzyme turns over catalytically as soon as nucleotide is added. Therefore, the enzyme was co-crystallized with the non-hydrolysable ATP analogue, adenylylmethylenediphosphonate (ACP). Producing structure-grade crystals of the complex involved extensive screening of protein constructs and crystallization conditions including host lipid MAGs. Best crystals, providing a ternary complex structure with ACP and lipid bound at 2.7 Å resolution (Table 1), were obtained with Δ4-DgkA grown in 9.9 MAG at 4 °C and soaked with zinc-ACP.

**Table 1 Crystallization conditions, data collection and refinement statistics.**

Full size table

Like the apo-enzyme12, the ternary complex is a homo-trimer (Fig. 1a,b). Each subunit has four helices, three of which are largely membrane embedded (H1-3), whereas the fourth, an N-terminal amphiphilic surface helix (SH), anchors the protein at the membrane interface (Supplementary Fig. 1a). Stereo images of individual subunit models and the electron density on which the models are based are shown in Supplementary Fig. 2. H2 and H3 extend out of the membrane and are connected by a cytosolic loop (CL) whose conformation and sequence position in the protein differ between subunits in ways that may have functional consequences (Supplementary Fig. 3), as discussed below. Individual subunits are identified suA, suB and suC. The trimer has three active sites of the shared sites type. Each site has contributions from two subunits, identified asAB, asBC and asCA, where asAB is created by the SH of suA and H1-3 of suB. In the complex, asBC has zinc-ACP and lipid bound (Fig. 1a,b). The other two sites are nucleotide-free.

**Figure 1: Overall structure of the DgkA-ACP-lipid ternary complex.**

(**a**,**b**) Views of the kinase trimer parallel to the membrane and from the cytosol, respectively, with subunits represented as brown, blue and green ribbons. ACP and lipid are shown in stick representation. The two grey spheres represent zinc. Putative membrane boundaries are shown as black lines. Active site asBC contains both ACP and lipid substrate. MAG1 and MAG2 are shown with carbons coloured black and violet, respectively. (**c**) Expanded view of zinc-ACP in the binding site. (**d**) Feature enhanced map (Methods section) of Zn-ACP at 1 σ. (**e**) Anomalous density maps for zinc contoured at 4.0 σ. (**f**) Feature enhanced map for lipid MAG1 in asBC contoured at 1 σ.

Full size image

### Ternary complex structure

The ternary complex site, asBC, contains zinc-ACP and two lipid substrates (Fig. 1a). The zinc-ACP is close to fully extended and is secured by electrostatic, hydrogen bonding and hydrophobic interactions along its length on the relatively flat, cytosol-exposed surface of H2C and H3C (Fig. 1a,c,d). The enzyme has a requirement for metal ions, known to be satisfied by zinc16. The two zinc atoms (Zn1, Zn2) bound to ACP were identified and positioned in the complex by anomalous scattering (Fig. 1e). They are bidentately coordinated, respectively, by the β- and γ- and the α- and γ-phosphates of ACP and fasten the polyphosphate to conserved residues Glu28C and Glu76C (Supplementary Table 1 and Supplementary Fig. 1b) in the active site in ways that make catalytic sense (Fig. 2a). MDS illustrate interactions between the γ-phosphate and the backbone amides of Ala29C and Ala30C (Supplementary Movie 1), both of which contribute to the helix dipole of H1C.

**Figure 2: Proposed mechanism and sensitivity to mutagenesis of the transphosphorylation reaction catalysed by DgkA.**

(**a**) Two-dimensional representation of the active and substrate-binding sites. The catalytic Glu69C abstracts a proton from the primary hydroxyl of lipid substrate MAG1 (red) creating a reactive alkoxide which attacks the γ-phosphorus of zinc-ATP (blue). The transition intermediate includes a pentavalent γ-phosphorus where the two substrates are covalently bonded together. On collapse, the ADP and lyso-PA products form and are released returning the enzyme to its original state. Residues that interact with ACP and MAG1 in the asBC site of the ternary complex are shown with hydrogen bond and ionic interactions indicated by hashed bonds. Hydrophobic interaction is highlighted as a black semicircle. Interactions that are likely and possible, but that are not supported by structure data, are indicated by dashed bonds. Structurally equivalent residues in cAMP-dependent protein kinase A are shown boxed with residue numbers as in PDB ID: 1ATP. (**b**) Kinase activity of DgkA as affected by site specific mutations. Kinase activity is expressed as a percentage of WT activity. Actual values are recorded in Supplementary Table 1. The one letter amino acid code is used. Residual activities of 0%, 0–0.5% and 0.5–5% are indicated by #, \*\* and \*, respectively.

Full size image

The two hydroxyls of ribose in ACP are tightly hydrogen bonded to the side-chain carboxyl of the essential Asp95C (Fig. 3a). These contribute to substrate binding and specificity, and explain why 2′-deoxy-ATP, with one less hydroxyl anchor to the protein, is a considerably poorer substrate2. Hydrophobic interactions between the non-polar surface of the ribose and the methylenes of Lys94C, itself a critical residue9,13 (Fig. 2b), contribute to fixing the ribose in place and to having it correctly oriented (Fig. 3a).

**Figure 3: Substrate-binding sites of DgkA.**

(**a**) Binding of the adenosine of ACP at the extracellular surface of active site asBC. Interactions are shown as dashed lines with distances between non-hydrogen atoms in Å. Protein and ACP carbons are coloured green and yellow, respectively. Oxygen and nitrogen are coloured red and blue, respectively. (**b**) Binding of the zinc-triphosphate moiety of zinc-ACP to asBC. Lipid carbons are coloured black. Distances for zinc coordination range from 2.0 to 2.2 Å. The asterisks indicate that little or no electron density was observed for the side chains of Arg9 and Glu28. However, interactions with zinc-ACP, of the type noted, were seen with both residues in MDS (Supplementary Movie 1). (**c**) The putative active site of DgkA where the catalytic residue Glu69C, ACP and lipid substrate MAG1 meet in asBC. The glycerol headgroup of MAG1 could not be oriented unambiguously in the active site based on the available electron density maps, even at 2.05 Å resolution (Supplementary Fig. 4a–d). Accordingly, the interactions between MAG1 and the enzyme are shown as dashed lines only and without specifying distances. The orientation shown, with the 1-OH in hydrogen-bonding distance to the carboxyl group of Glu69, is plausible in light of a careful consideration of the available maps and the nature of the lipid substrate and the reaction being catalysed.

Full size image

The purine ring of ACP is locked in position by hydrogen bonds between the N1 and N6 of adenine and the backbone linkage of His87C and Glu85C, respectively, in CLC (Fig. 3a). Such backbone-adenine interactions form the basis of nucleotide recognition by analogy with base pairing in nucleic acids. Backbone interactions are relatively residue non-specific. This explains mutagenesis work where neither residue was identified as essential (Fig. 2b and Supplementary Table 1). Between Glu85 and His87 is Tyr86C whose tyrosyl ring hovers close to the adenyl of ACP poised for π–π stacking to lock adenine firmly against the protein (Supplementary Fig. 3c,f). We refer to these three sequential residues as the clamping triad. The purine is secured too by its N7 interaction with the ɛ-amino of Lys94C, which also interacts with the α-phosphate of ATP, and is tethered in place by a salt bridge with Asp80C (Fig. 3a). As expected, this position is, by contrast, sensitive to mutation. Together with Glu85C, His87C and Asp95C, Lys94C acts like a multiply tipped pincer to lock the adenosine of ACP in a specific orientation on the protein (Fig. 3a). Measured *k*cat values of DgkA for guanosine triphosphate (GTP) and inosine triphosphate (ITP) are reduced by orders of magnitude compared with ATP (ref. 2). This purine selectivity makes sense in light of the ternary structure. Thus, replacing the N6 in adenine with an O6 in guanine or inosine would lead to unfavourable interactions between the two purines and adjacent backbone carbonyls of Gly83, Ser84, Glu85 and Val79. Clear evidence of instability with GTP was observed by MDS. Likewise, the crystal structure is not compatible with tight pyrimidine nucleotide binding, consistent with the observation that while adenine nucleotides dissolved crystals of DgkA, cytidine triphosphate (CTP), uridine triphosphate (UTP) and thymidine triphosphate (TTP) did not12. MDS show that ATP is extremely stably bound with the same orientation and interactions as ACP in the crystal structure (Fig. 4a and Supplementary Movie 1). ACP is therefore a reliable ATP analogue.

**Figure 4: Changes in the active site of the DgkA ternary complex at the beginning and end of a 100-ns MDS.**

(**a**) WT simulation of ATP based on the ACP coordinates. There are limited differences in the binding site between the start (grey) and end (colour) of the MDS. (**b**) E28A mutation (red). This principally affects the binding of the Zn2 ion. In the absence of the E28 side chain the zinc ions become purely coordinated by E76 and the ATP phosphates. As a result, the entire zinc-ATP complex moves away from the protein, towards the cytoplasm. This, in turn, slightly alters the conformation of the CL. (**c**) E76A (red). To compensate for the loss of E76, the zinc ions move towards the membrane to interact with E69. This pulls the ATP in the same direction and, in turn, the CL is affected. (**d**) K94A (red). The WT residue coordinates both α-phosphate and N7 of the adenine ring of ATP. The loss of the basic side-chain releases the adenine of ATP and the binding is lost. In WT simulations, K94 forms a salt bridge with D80 and it is expected that the loss of this bridge in the D80A mutant can also explain the loss of catalytic ability in this mutant. (**e**) GTP. The major difference in dynamics is observed in the CL, where the loss of the N6 hydrogen bond with the backbone of E85 destabilizes purine binding and the CL. (**f**) ADP. The ADP molecule is expected to leave the binding site after catalysis has taken place. A change in zinc ion coordination takes place as Zn1 now coordinates the α- and β-phosphates of ADP. This relocates ADP closer to K94, which also coordinates both phosphates. In turn, K94 no longer interacts with the N7 position of the purine ring, which changes conformation, priming the ADP molecule for exit. Throughout this legend, WT refers to Δ4-DgkA (ref. 12).

Full size image

The ternary complex asBC contains two lipid substrates (MAG1, MAG2; Fig. 1a). MAG1 has been modelled into the electron density map with its headgroup deep in the protein positioned at the level of the membrane interface with its reactive 1-OH next to the γ-phosphate of ACP (Fig. 1c,f). MAG2 is in the putative lipid substrate-binding pocket, with its headgroup ∼4 Å from MAG1. Their acyl chains extend into the membrane along the hydrophobic surface of the protein. Since DAG, with two acyl chains, is the canonical lipid substrate of DgkA (ref. 2), finding a pair of MAGs as noted, implies they demark the lipid substrate-binding site.

The electron density for MAGs in the complex is variable and in parts, discontinuous (Supplementary Fig. 4a–d). However, in our studies of DgkA to date, we have crystal structures that include a total of 10 trimers with density in the active site for bound lipid that is variable (refs 12, 17 and this work). Mapping these onto a single active site makes a convincing case that lipids reside in the binding pocket (Supplementary Fig. 4e–g). Their variable definition likely reflects acyl chain flexibility and lipid movement during reaction.

The two other active sites in the complex lack nucleotide (Fig. 1b). asAB has two MAGs situated similar to those in asBC. Like asBC, asAB includes an almost complete SH that creates a well-defined active site. By contrast, the SH of asCA is not visible in density until Ser17A. Accordingly, this active site appears wide open (Fig. 1b). It contains just one, distant MAG.

### Reaction mechanism

Mutational studies have identified residues in DgkA that impact on catalysis (refs 9, 13 and this work). They include Thr8, Arg9, Ser17, Gly20, Glu28, Ala30, Glu34, Glu69, Asn72, Ser73, Glu76, Asp80, Gly83, Ser90, Lys94, Asp95, Gly97 and Ala100 (Fig. 2b). Convincingly, 14 out of the 18 are proximal (≤5 Å) to the nucleotide and lipid substrates in the ternary complex and all are exposed to solvent during the MDS (Fig. 3a–c, Supplementary Fig. 5). They demark the substrate binding and catalytic sites. The putative catalytic site resides on the protein at the membrane/cytosol interface where the reactive moieties of the two substrates, with disparate polarities, come together for reaction.

The active site includes glutamates and an aspartate predicted to play roles in substrate binding and catalysis (Fig. 3a,b). Concerns have been raised generally regarding possible X-ray damage to anionic residues18 and to irrelevant conformational substates trapped as a result of collecting diffraction data with an intense synchrotron microbeam at 100 K (refs 19, 20). To address these issues we have obtained a structure by serial femtosecond crystallography (SFX) with an X-ray free-electron laser (XFEL) at room temperature (RT) and ahead of radiation damage21,22,23 (Table 1). It suggests that damage and ‘frozen’ conformational substates were not major issues under current conditions and that the ternary complex structure reported here is reliable. Alternative conformers for side chains of three critical residues, Glu34, Glu69 and Glu76, were observed in the XFEL structure at RT that may be functionally relevant, as discussed (Fig. 5a,b,d,e).

**Figure 5: Rationalizing functional roles of highly conserved residues in DgkA not directly involved in catalysis.**

(**a**) The anionic carboxyl of Glu34C is proposed to elevate the p*K*a of catalytic residue Glu69C making it a stronger base for proton abstraction from the lipid (green protein carbons). Electron density (mesh) for alternative Glu34 conformers was observed in the XFEL data recorded at RT (purple carbons) that may enable a switch in p*K*a at Glu69. (**b**) Alternative conformations for Glu76C in the XFEL structure. The first (Glu76\_1) is in position to coordinate with Zn2. Black dashed lines correspond to distances 2.0–2.2 Å. The second (Glu76\_2) has the coordinating oxygen at some distance (3.8 Å, green dashed line) from Zn2 where it may facilitate product release. The polyphosphate and zinc are superimposed from the ternary complex on the XFEL apo-structure. (**c**) Side-chain amide nitrogen of Asn72C coordinates with carboxyls of Glu69C and Glu76C, both essential residues. By weakly interacting with γ-phosphate oxygens, the electrophilicity of the γ-phosphorus is elevated making it more reactive. Additionally, the amide may stabilize a transient bisubstrate by being positioned close to where the pentavalent intermediate is likely to form between the 1-OH of MAG1 and the γ-phosphate of ACP (dotted blue line). Likely interactions between MAG1 and the enzyme are indicated by dashed lines only. (**d**) Alternative conformations for Glu69 observed in the XFEL structure (magenta carbons) superimposed on the DgkA ternary structure (green carbons). The first conformation (Glu69\_1) is like that seen in the ternary complex and interacts with MAG1. The second (Glu69\_2) extends into the membrane and may guide lipid substrate to the active site. (**e**) An expanded view of Glu69 in **d** with electron density corresponding to alternative conformers seen in the XFEL structure superposed. (**f**) The methyl side chain of Ala30C (red circle) is proposed to provide room for lipid substrate and product to pass between the start of SHB and the top of H1C that define the gateway into and out of the active site. The Cα–Cα distance from Ala30C (red circle) to Ala13B (blue circle) in asBC is 10.0 Å.

Full size image

Convincing kinetic and biochemical evidence supports a direct, in-line phosphoryl transfer mechanism for DgkA (ref. 2). This is in contrast to one that requires the formation of an enzyme-phosphate intermediate with subsequent phosphotransfer to the lipid substrate. The direct route displays a hallmark, trigonal bipyramidal phosphorus intermediate and a random kinetic pathway where one substrate does not exclude the binding of the other. Further, the γ-phosphate of ATP should be proximal to the 1-OH of the lipid substrate. This is what was observed in the ternary complex where the two entities are poised for reaction ∼4 Å apart (Fig. 3c). The separation is reminiscent of what has been interpreted for DgkA and for water-soluble kinases, where a tetraphosphate analogue of the bisubstrate (ATP-DAG in the case of DgkA) is a better inhibitor than the bisubstrate itself2. Presumably, the extra space accommodates both substrates, the reactive moieties of which are brought together for reaction by a small conformational change in the protein.

Glu69 is a conserved, essential residue in DgkA (refs 9, 13; Fig. 2b, Supplementary Table 1, Supplementary Fig. 1b). In the liganded asBC, its carboxyl is in hydrogen-bonding distance to the 1-OH of MAG1 (Fig. 3c). By analogy with other kinases24, we propose that Glu69 initiates catalysis by abstracting a proton from this primary hydroxyl. In this configuration, the proximal Glu34C (Fig. 5a, Supplementary Fig. 6, and Supplementary Fig. 7) is predicted to have a p*K*a of 7.53 and therefore will be protonated at neutral pH, acting as a hydrogen bond donor to Glu69C at rest. This is a stable configuration in the MDS. Due to the hydrophobic nature of the pocket, deprotonation of Glu34C will elevate the p*K*a of Glu69C making it a stronger base and a better general-base catalyst. We hypothesize, therefore, that deprotonation of Glu34C is the trigger for catalysis in a substrate-loaded enzyme. Interestingly, in the XFEL structure of the apo-enzyme there are two conformations for Glu34 and Glu69. One of each conformer has a matching partner in the cryo structure described above that can be isolated from the MDS by switching the protonation states of Glu34C and Glu69C. In the case of Glu69, the alternate conformation extends deeper into the membrane and has a predicted p*K*a value of 8.82. This is reflected in the MDS, where protonation of Glu69C induces a side-chain switch to this conformation and inversion of the hydrogen-bonding configuration with Glu34C. This is likely to be the side-chain rotamer after the proton has been removed from the primary hydroxyl of the lipid substrate. Alternatively, this may guide substrate lipid entering from the bilayer to the active site (Fig. 5d,e). With Glu34, the two conformers may also provide a switch that controls the p*K*a and basicity of Glu69. The lipid alkoxide formed on proton abstraction is in position to attack the γ-phosphate of ATP which leads to the formation of the pentavalent intermediate, stabilized by Asn72C and/or Arg9B (Figs 2a, 3b and 5c). Collapse of the intermediate severs the β−γ linkage, generating lyso-phosphatidic acid and ADP as products. Since both are negatively charged, product egress might be aided by electrostatic repulsion from anionic residues Glu69C and Glu76C in the active site, accompanied by metal-binding site rearrangement, and by cationic residues Arg9 and Lys12 in the SH proposed to draw the lipid out as the SH flexes away from the site (Fig. 4f). On release, the active site is reset for another round of catalysis, with Glu34 reprotonating from Glu69 (Supplementary Figs 6,7).

MDS show clearly that ADP is positionally unstable in the binding site (Fig. 4f, Supplementary Movie 1). DFT simulations on MDS-sampled configurations displaying intimate MAG1 contacts (similar to Fig. 3c) suggest that 1-OH proton abstraction by Glu69C is kinetically more accessible than phosphate cleavage (Supplementary Fig. 8, Methods section). In accord with the proposed pentavalent stabilization by Asn72C and/or Arg9B (Fig. 2a), the cleavage step is likely to be rate-limiting.

Two MAGs have been modelled in the liganded asBC. The 1-OH of MAG1 is proximal to the carboxyl of the putative catalytic Glu69C (Fig. 3c). Ser98C interacts with the 2-OH of MAG1 which, in the case of the canonical substrate DAG, would be in ester linkage to an acyl chain. The carbonyl oxygen at the ester linkage in MAG1 is within hydrogen-bonding distance of critically important Ser17B. Together, these interactions with highly conserved and/or critical residues fix the headgroup of the lipid substrate in position for proton abstraction by Glu69C and for reaction with the γ-phosphorus of ATP (Fig. 3c). The lipid acyl chains reside within or close to a three-walled hydrophobic pocket created by the transmembrane stretches of H1-3C (Supplementary Fig. 4e–g). The pocket appears to use the bulky and highly conserved Trp112C (Supplementary Table 1 and Supplementary Fig. 1b) with the plane of its indole ring oriented, by hydrogen bonding to Ser61C in the trimer core, to create a base for the pocket below which the chains do not extend (Supplementary Fig. 4f). Its location towards the bilayer mid-plane may contribute to defining lipid substrate chain-length preference.

### Comparison with other kinases

In support of the proposed mechanistic model, we note the striking resemblance between critical residues in the active site of DgkA and their equivalents in cAMP-dependent protein kinase (PKA) for which a similar catalytic mechanism is well established24,25 (Fig. 2a). To begin with, the catalytic residue in both kinases is anionic, Glu69 in DgkA and Asp166 in PKA. While magnesium is a common ATP counter-ion in kinases, zinc can serve this role in DgkA (ref. 16). Both zinc ions in the ternary complex bind electrostatically with the γ-phosphate of ACP and, by electron withdrawing effects, render the phosphorus more susceptible to attack by the lipid nucleophile. The same kind of interaction is seen in PKA. Lys94C coordinates with the α-phosphate of ACP in a manner analogous to its counterpart, Lys72, in PKA. Lys94C is stabilized in position by a critical Asp80C, just like the Lys72-Glu91 pair in PKA. The essential Glu76C chelates the two zincs which, in turn, bind the triphosphate of ACP. The equivalent residue in PKA is Asp184. Parenthetically, a second conformation for the side chain of Glu76C is present in the XFEL apo-structure which is more removed from the metal ions; it may play a role in product release (Fig. 5b). Arg9 is functionally important and mutating it dramatically alters DgkA activity. While its side chain lacks full density in the DgkA complex, one of its possible conformers makes a convincing interaction with the α-phosphate of ACP, reminiscent of the role played by Lys168 in PKA. Asn72 is essential in DgkA (Fig. 2b and Supplementary Table 1). Its side-chain carbonyl is 4.1 Å from Zn2 while its amide nitrogen bridges the essential Glu69 and Glu76 (Fig. 5c). The equivalent residue in PKA is Asn171; it bridges Asp166 and Asp184 and its carbonyl is 2.1 Å from manganese (Mn1).

The similarity between the binding sites of DgkA and PKA extends to the adenosine end of the nucleotide. Thus, the aforementioned clamping triad on adenine in the CL of DgkA that includes Glu85-Tyr86-His87 is matched by an almost identical triad in PKA represented by Glu121-Tyr122-Val123 (Figs 2a and 6). At the same time, the two ribose hydroxyls are anchored by Asp95 in DgkA and by Glu127 in PKA. The resemblance between residues in and chemical architecture of the active sites of DgkA and PKA is remarkable given that the two kinases are evolutionarily unrelated and have essentially no primary through quaternary structure similarities.

**Figure 6: Similarities in the binding coordination of adenosine by DgkA and cAMP-dependent protein kinase A.**

(**a**) DgkA, this study. (**b**) Protein kinase A, PDB ID: 1ATP. Only the similarities are highlighted. In **a** one surface of the adenosine moiety faces the protein, the other faces the cytoplasm. In **b** the adenosine is sandwiched between the N- and C-terminal lobes of PKA.

Full size image

### Mutagenesis

With the ternary complex structure in hand, hypotheses regarding the role of specific residues in DgkA enzymatic activity were tested by systematic mutagenesis. Kinetic measurements were performed with the mutants reconstituted in the LCP. A total of 23 sites were mutated with the types screened dictated by the putative role for the particular residue. The results are summarized in Fig. 2b and Supplementary Table 1 along with data from separate mutational studies9,13. A few notable mutants will be discussed here, as follows. (i) Glu69 is the putative catalytic residue in DgkA (Figs 2a and 3c), in contrast to Asp which serves that function in serine protein kinases. Strikingly, Glu69 tolerated none of the mutations tested, one of which was Asp (p*K*a 3.8). This could be a spatial effect because the side chain of Asp is too short. It may also have to do with the fact that the 1-OH in glycerides like MAG and DAG have p*K*a values (13.6) higher than those of PKA substrates Ser/Thr (p*K*a 13.0). Glycerides therefore may require the carboxyl of Glu, with a p*K*a of 4.3, or higher enabled by nearby Glu34, for proton abstraction. (ii) The conserved Asp95 coordinates the hydroxyls of ribose in ACP, preserved throughout the MDS, and the carbonyl of Gly91 (Fig. 3a). Mutating it to Ala essentially abolished activity. However, Glu with its longer side chain did substitute but activity was reduced by 76%. By contrast, Asn had a minor effect which makes sense given that its side-chain amide can hydrogen bond with carbonyls and hydroxyls. (iii) Ala30 resides on H1 in the active site entrance at the membrane interface (Fig. 5f). Its methyl side chain was speculated to enable lipids with small headgroups to enter the site. Mutating it to the bulky leucine reduced activity by 93% consistent with a putative gatekeeping role. (iv) Gly83 in the CL was proposed to facilitate the helix-coil transition enabling adenine binding (Supplementary Fig. 3). Mutating it to Pro was expected to compromise such activity. Indeed, the Gly83Pro mutant was virtually dead enzymatically; MDS show dynamic instability of the CL (Supplementary Movie 2) and (v) finally, Asn72 plays a key role in catalysis. Its side-chain amide bridges Glu69 and Glu76 (Fig. 5c) both of which are essential. These H-bonds bridge the two essential residues throughout the MDS. The Asn72Ala mutant is catalytically inactive. For all intents and purposes, so too are the Asn72Gln and Asn72Asp mutants. These data show how important both the precise chemistry and the architecture of this part of the binding/active site are for catalysis. The structure-based, hypothesis-testing mutations and others in Fig. 2b and Supplementary Table 1 lend credence to the complex model and mechanism of kinase action.

## Discussion

DgkA is the tiniest of kinases. With just 121 residues and a trimeric constitution, three kinase catalytic sites have been fashioned (Fig. 1). Each acts at the membrane/cytosol interface. The rest of the protein creates binding pockets on either side that position the reactive ends of two large substrate molecules with dramatically different polarities in juxtaposition for reaction. The ternary structure explains in atomic detail how the nucleotide and lipid-binding sites interact with substrate molecules. The many, contact site-docking defines a specific orientation for the nucleotide that presumably is optimized for transphosphorylation. Particularly striking is the similarity between the binding site architecture of this bacterial DgkA and mammalian PKA (Figs 2a and 6), kinases that bear no resemblance at any other level of structure. Thus, these defined points of chemical constitution arrayed precisely in three-dimensional space have evolved independently achieving a similar end in entirely different protein contexts – a convincing case of convergent evolution.

DgkA’s small size shows that a functioning kinase can be built with very little protein mass. The ternary structure points to a minimum required for that purpose. Inspecting the complex suggests that a pair of helices, each 3-4 turns long, connected by a 7-residue loop (Supplementary Fig. 3) might be all that is needed to create an ATP-binding module. The ternary structure should serve as a template for rational protein and enzyme design, optimizable for solubility, stability, specificity and catalytic efficiency.

Kinetic studies suggest that DgkA functions with a moderate level of heteroallostery1. Thus, the binding of one substrate influences (in this case positively) that of its co-substrate. In a multimer like DgkA, it is possible for heteroallostery to come about through inter-subunit signalling. The fact that any given active site is a composite, with components from at least two subunits, suggests a way for the substrate-bound status of one site to be relayed to another; the SH is an obvious means for inter-subunit information transmission. In this way, the enzyme could present simultaneously three active sites in distinct states. We find some evidence for this in the ternary structure where only one of the three active sites is occupied by ACP. Further, two of the sites in the CL region, which clamps onto the nucleotide base, are profoundly different (Supplementary Fig. 3). Neither CL is involved in crystal contacts. Presumably therefore both are physiologically relevant. We propose that the three sites in DgkA are in different states at any given time during catalysis. However, it is possible to model a symmetrical DgkA trimer that is stable in MDS, indicating that the enzyme may adopt a symmetrical configuration. This does not imply that all three sites are catalytically active at the same time. Additional mechanistic and structure work is required to evaluate allosteric coupling within the enzyme.

As a trimer situated with half its bulk in the membrane and half in the cytosol, DgkA has features that make it a good biocatalyst. Its three active sites are arranged around the enzyme’s periphery (Fig. 1b) opening to the cytosol and the membrane for easy access and egress of substrates and products. This naturally raises the probability of productive encounters between substrates and binding sites, thus elevating the reaction rate compared to a hypothetical solitary active site. Conformational changes, where needed for turnover, would appear to be relatively minor involving small segments such as the CL for nucleotide and the SH for lipid and nucleotide binding. This should ensure efficient substrate loading and product release. The reduction in dimensionality, as a result of lipid substrate and enzyme confinement to a two-dimensional membrane, increases overall efficiency of delivery. The amphiphilic nature of the lipid and of the membrane in which it and the kinase reside, ensure the spontaneous and proper alignment of substrate in the lipid-binding site for reaction. These features of trimeric DgkA undoubtedly contribute to making it an efficient biocatalyst, described previously as an evolutionarily optimized integral membrane enzyme.

## Methods

### Molecular biology and protein production

All but two of the DgkA mutants were generated by PCR-based site-directed mutagenesis using the plasmid pTrcHisB-DgkA-WT (ref. 14) as the template. In the case of E34D and E34A, constructs with the desired mutation could not be produced after several rounds of mutagenesis trials. Instead, the corresponding genes were synthesized chemically (Genescript). All mutations were confirmed by DNA sequencing (MWG Biotech). Detailed purification procedures are described in ref. 14. Briefly, *E. coli* WH1061 cells carrying DgkA plasmids and grown in Luria-Bertani broth were induced at an optical density of 0.6 for 3 h at 37 °C with 1 mM IPTG. All subsequent steps were carried out at 4 °C unless otherwise specified. For crystallization, cells from 1 l of culture were lyased by sonication in buffer containing 0.2 mM TCEP, 0.3 M NaCl, 0.2 mg ml−1 lysozyme, 50 μg ml−1 DNAase, 10 μM BHT, 1 mM PMSF, 0.2 mM EDTA, 5 mM MgCl2 and 75 mM Tris/HCl pH 7.8. Empigen BB was added to the cell lysate at 3.3% (w/v) to solubilize DgkA for 1 h. Unsolublized material was removed by centrifugation at 9,000*g* for 10 min. The supernatant containing N-terminally His-tagged DgkA was allowed to bind to 4 ml of Ni-NTA resin for 1 h. The resin was packed in a gravity column, which was washed with 3% (w/v) Empigen BB, 10 mM imidazole in Buffer A (0.3 M NaCl, 0.2 mM TCEP, 40 mM HEPES pH 7.5) and 1.5% (w/v) Empigen BB, 40 mM imidazole in Buffer A. The detergent Empigen was then exchanged to *n*-decyl-β-D-maltopyranoside (DM) by washing the column with 12 column volumes of buffer containing 0.25% (w/v) DM, 50 mM LiCl, 0.2 mM TCEP, 20 mM HEPES pH 7.5. Protein was eluted with 0.25 M imidazole in buffer containing 0.5% (w/v) DM, 1 mM TECP, 50 mM LiCl and 10 mM HEPES pH 7.5. Pooled fractions were concentrated and run through a size-exclusion chromatography with a Superdex 200 16/600 column in buffer containing 0.25% (w/v) DM, 1 mM TCEP, 0.1 M NaCl and 10 mM Tris HCl pH 7.5. Fractions corresponding to the central peak were pooled. Protein was concentrated to 12 mg ml−1, flashed frozen in liquid nitrogen as 11 μl aliquots and stored at −80 °C until use. For functional assays, protein was purified from 0.1 l of cell culture, omitting the size-exclusion chromatography step. Size-exclusion chromatography had no effect on specific activity.

### Enzyme assays

*In meso* measurements of WT and mutant DgkA kinase activity were carried out as follows15. DgkA was reconstituted into LCP by mixing the protein solution with a 1.5-fold volume of monoolein. Five microliters of LCP was dispensed into each well of a 96-well plate. The coupled enzyme assay reaction was initiated by adding 200 μl of Assay Mix (20 mM ATP, 0.1 mM EDTA, 0.1 mM EGTA, 55 mM magnesium acetate, 1 mM phosphoenolpyruvic acid, 0.2 mM dithiothreitol, 50 mM LiCl, 0.4 mM NADH, 20 U ml−1 of pyruvate kinase and lactate dehydrogenase, and 75 mM PIPES pH 6.9) pre-warmed to 30 °C. The decrease in A340, caused by the oxidation of NADH which is coupled to ATP–ADP conversion, was recorded every 6–10 s over a period of 1 h. For WT enzyme and fully functional constructs, the protein concentration used for reconstitution into the mesophase was 0.066 mg ml−1. For mutants with <∼70% of WT activity, protein concentration was adjusted to 0.1−5 mg ml−1 to increase measurement sensitivity.

### Crystallization

*In meso* crystallization of the apo form of Δ4-DgkA for synchrotron radiation data collection was carried out using an *in meso* robot15. The 96-well glass sandwich crystallization plates were incubated at 4 °C for crystal growth15. The precipitant solution contained 7–9% (v/v) 2-methyl-2,4-pentanediol (MPD), 0.1 M NaCl, 0.1 M KNO3, 0.1 M Na3C6H5O7 (sodium citrate) pH 5.6 for 9.9 MAG, and 4—7% (v/v) MPD, 0.1 M NaCl, 0.06 M Mg(CH3COO)2 (magnesium acetate), 0.05 M Na3C6H5O7 for 7.9 MAG. Crystals were harvested and snap cooled in liquid nitrogen26.

To produce crystals of DgkA in complex with an ATP analogue, extensive screening was performed that involved exploring protein constructs, crystal forms, host MAGs, analogues, crystallization precipitants and temperature. Trials with Δ4-DgkA in 9.9 MAG with zinc-ACP at 4 °C eventually provided crystals and a structure at 2.70 Å resolution. Crystals were soaked directly in glass sandwich plates for 2 h at 4 °C using precipitant solution (7–10% (v/v) MPD, 0.1 M NaCl, 0.1 M KNO3, 0.1 M Na3C6H5O7 pH 5.6) supplemented with 60 mM Zn(CH3COO)2 and 10 mM ACP. Harvesting was performed, as noted above.

For measurements with the XFEL, crystallization was carried out at 20 °C in coupled micro-syringes using 7.9 MAG as host lipid27,28,29. The precipitant solution contained 0.2% (v/v) MPD, 0.1 M NaCl, 0.05 M Na3C6H5O7 pH 5.6. Microcrystals were identified by bright-field and polarized light microscopy, SONICC and tryptophan fluorescence at the Linac Coherent Light Source (LCLS). Crystal-laden mesophase was transferred to an LCP injector and extruded for data collection into an evacuated chamber at 20 °C, as described below.

### Synchrotron data collection and processing

Synchrotron diffraction data were collected at beamline 23-ID-B, Advanced Photon Source (USA), I24, Diamond Light Source (UK) and PXII, Swiss Light Source (SLS, Switzerland) at 100 K. At the Advanced Photon Source, data were collected with a 1° oscillation and a 1-s exposure per frame, a collimated beam size of 10 μm, and a sample-to-detector distance of 350-500 mm, with a MAR 300 CCD detector using 1.033 Å X-rays. At the Diamond Light Source, data were collected with a 0.2° oscillation and a 0.2-s exposure per frame, a microfocus beam size of 10 μm and a sample-to-detector distance of 500–650 mm, with a Pilatus 6M detector using 0.978 Å wavelength X-rays. At the SLS, data were collected with a 0.1 oscillation and 0.1-s exposure per frame, a collimated beam size of 10 × 15 μm2 and a sample-to-detector distance of 450–600 mm, with a Pilatus 6M detector using 1.033 Å X-rays.

Synchrotron-derived diffraction data were reduced with xia2 (ref. 30) using XDS (ref. 31) and XSCALE (Table 1). Optimum data wedges were identified by data quality and isomorphous unit cell parameters. Complete data sets for Δ4-99MAG-ACP and Δ7-79MAG (Table 1) were obtained by merging data collected from 4 and 6 crystals, respectively. A single crystal was used for the anomalous data collected at the zinc edge (Zn-edge Δ4-99MAG-ACP in Table 1).

### XFEL data collection and processing

XFEL data were collected using the CXI instrument32 at the LCLS at SLAC National Accelerator Laboratory27,33. The LCLS was operated at a wavelength of 1.302 Å (9.5 keV) delivering X-ray pulses of 50 fs pulse duration and with 8 × 1011 photons per pulse focused into a spot size of ∼1.5 μm × 1.5 μm2 using a pair of Kirkpatrick–Baez mirrors. Needle-shaped protein microcrystals ranging in length from 10 to 40 μm dispersed in the LCP were injected into the focus region at 0.17 μl min−1 using a continuously flowing LCP injector with a nozzle capillary diameter of 50 μm (ref. 27). Single-shot diffraction patterns of randomly oriented crystals were recorded at a rate of 7,200 patterns per minute (120 Hz) using the Cornell-SLAC hybrid Pixel Array Detector (CSPAD) detector34. The sample-to-detector distance of ∼122 mm corresponded to a maximum obtainable resolution of 2.0 Å at 1.302 Å wavelength. Data collection required 4.5 h of beamtime and used 42 μl mesophase corresponding to 220 μg protein.

A total of 1,987,632 frames were collected, of which 180,031 (9.1%) were identified as ‘hits’ having crystal diffraction by the software package Cheetah35, from which 140,440 (78.0%) could be indexed and integrated using CrystFEL (ref. 36). The location of individual sensors on the CSPAD detector was determined to better than one pixel error by comparison of predicted and observed Bragg peak locations, and was key to obtaining a high indexing rate and data quality. Reflection intensities from all indexed diffraction patterns were integrated without applying a per-pattern resolution cut-off and merged in Point Group *mmm* using CrystFEL to produce one set of reflection intensities for structure determination. XFEL data could be evaluated to 2.15 Å, with a CC\* of 0.998 (0.30 in the highest resolution shell) and I/sigma of 19.0 (0.33 in the highest resolution shell). Selection of the highest resolution shell (2.18 Å) was based on CC\* and on improvements in *R*work/*R*free values, as well as map quality on stepwise screening higher resolution limits (2.13, 2.15, 2.18, 2.2 and 2.4 Å) during refinement37.

### Structure solution, model building and refinement

Structures were solved by molecular replacement (MR) using published models (PDB ID: 3ZE3 and 3ZE4) with Phaser38. Coot39 and Phenix40 were used for manual building and refinement, respectively. Ligands were built based on feature enhanced maps41 and composite omit 2Fo-Fc maps. Lang *et al*.42 reported that the noise level in 2Fo-Fc maps is generally over estimated. Accordingly, the 2Fo-Fc map contoured at 0.7 σ, together with the strong electron density in the chain region of other DgkA structures (Supplementary Fig. 4), informed building the acyl chain of MAG1 in the asBC active site. The position of the two zinc ions were fixed during refinement based on an anomalous difference map (Fig. 1e) generated from X-ray diffraction data collected at the zinc edge (1.28238 Å, Table 1). The feature enhanced map (FEM)41 of the Zn-ACP moiety was calculated as follows. MR was performed with a DgkA trimer crystallized in the absence of nucleotide and an FEM was calculated directly from the MR solution using Phenix without adding nucleotide to the model. For the MAG1, the FEM was calculated as for the Zn-ACP but with MAG1 in place. Figures were prepared using PyMol.

### Molecular dynamics simulations

All MDS were performed using GROMACS v5.0 (ref. 43). Initial Coarse Grained (CG) MD simulations using the Martini 2.2 force field were run for 1 μs to permit the assembly and equilibration of a dipalmitoylphosphatidylglycerol (DPPG): dipalmitoylphosphatidylethanolamine (DPPE; 1:3 mole ratio) bilayer around DgkA (ref. 44). The end-snapshot of the CG simulations were then converted to atomic detail with the crystal structure aligned with the CG protein within the assembled lipid bilayer45. The systems were then equilibrated for 1 ns with the protein restrained before 100 ns of unrestrained atomistic MD using the Gromos53a6 force field46. In almost all cases, ATP, Zn2+ and MAG were included. In one instance, GTP was included instead of ATP. In a second case, ADP and lyso-phosphatidic acid were included in place of ATP and MAG. Parameters for catalytic intermediates were also designed, with the associated coordinates simulated in the complex. Systems were neutralized with a 150-mM concentration of NaCl. *In silico* mutagenesis was performed using PyMol.

### Density functional theory

Modelling chemical reactions is not possible with (classical) MDS. Accordingly, using *ab initio*-based DFT molecular-simulation techniques to probe putative reaction paths and energetics is of relevance and help to enzyme reaction mechanism studies. Gaussian 09 software B3LYP/6-31G(d,p) simulations were performed on MDS configurations like Fig. 3c, featuring intimate MAG1 contacts; other configurations were less energetically plausible. MM (AMBER), ONIOM-QM/MM (ref. 47) and DFT geometry-optimization led to retaining zinc atoms and residues within ∼7 Å (244 atoms) and ∼8 Å (365 atoms) of MAG1, for MAG1’s reliable energetic and geometric interactions.

Examining carefully MDS-sampled, ‘cut-down’ configurations of the ternary complex’s active site similar to Fig. 3c, the energetics of possible interactions of 1-OH with neighbouring protein residues were studied. Both geometry optimization and systematic movement of the lipid substrate’s 1-OH proton towards nearby residues were used to examine the change in the system's energy along this proton abstraction path. In DFT, albeit approximate, the electron probability density around nuclei is determined, so geometry optimization can ‘relax’ and move the nuclear coordinates to lower the system’s energy to a (local or global) minimum. Relaxation of particular configurations could include 1-OH proton transfer, or rearrangement of bonds, or the formation of a (near-) covalent bond between an 1-O oxyanion (or even 1-OH with proton intact) and the γ-phosphorus atom to form a pentavalent intermediate structure (Supplementary Fig. 6). A key point regarding these possible events is their energetic (and kinetic) ‘accessibility’, especially in relation to background thermal energy ∼RT. At room temperature (RT) is around 0.6 kcal mol−1. Accordingly, such reaction events accessible for routine observation during geometry optimization would typically have energy barriers of ∼2–3 kcal mol−1, or less. Indeed, the connection between reaction-energy barriers and approximate rates is well-established in chemical kinetics. On this basis, we found that the only likely interaction with protein residues for reaction of 1-OH was with Glu69, featuring a prominent hydrogen bond with the proton in 1-OH pointing directly to Glu69. In some cases, geometry optimization entailed the direct transfer of the proton to Glu69, suggesting an energy barrier of ∼2–3 kcal mol−1, or less. The relative potential-energy profile for this is shown in Supplementary Fig. 8b, where the ‘kink’ in slope denotes the rupture of the O–H covalent bond prior to formation of the bond with Glu69. Because movement along this direct path (cf. Supplementary Fig. 8a) does not necessarily follow a minimum-energy path across the potential-energy landscape (akin to taking an ‘as-the-crow-flies’ route through a valley, rather than following a slightly meandering river), the ∼5 kcal mol−1 barrier is an overestimate, and direct transfer in structure relaxation suggests the actual barrier is lower (see above). The sharply ‘downhill’ energetic nature of proton transfer indicates an approach towards spontaneity for this event. This transfer is facilitated greatly by the prominent hydrogen bond’s strong electrostatic interaction, especially given the high charge-to-mass ratio of the proton.

Optimization of the alkoxide form led to the formation of a somewhat strained, imperfect covalent bond for the resultant (1-O) oxyanion (*sans* proton) with the γ-phosphorus atom, not unusual for a pentavalent intermediate, suggesting reasonable kinetic accessibility with a ∼2–3 kcal mol−1 barrier. However, further structure relaxation did not suggest any rupture (or meaningful stretch/strain) of the bridging γ-P–O bond. Extending systematically this covalent bond until breakage, the relative potential-energy profile (Supplementary Fig. 8b) suggests a reaction-energy barrier of ∼15 kcal mol−1. Unlike the hydrogen bond in proton transfer, there is no appreciable local electrostatic interaction in this bond. The much larger mass of P and O atoms and inertia of the MAG1 and to-be-formed ADP moieties compounds this, altering the character of this potential-energy profile. With a large positive barrier to be crossed, it is much less kinetically favourable. Here, the substantial positive-energy ‘hill’ shows clearly the unfavourable nature of extending the bond from a local minimum in the immediate vicinity of the ‘reactant’ state, hindered by less electrostatic interaction, until rupture beyond 0.5–0.6 Å. This is somewhat consistent with previous computational estimates of 26.7 kcal mol−1 (based on potential-energy differences), albeit for cleavage of ATP (only) in explicit water, and not in the current protein milieu48. Such ‘as-the-crow-flies’ overestimates of energy barriers *vis-à-vis* relatively (but not completely) ‘straight’ paths (akin to those shown in Supplementary Fig. 8a and traversed in b) is around double. This would suggest a γ-P–O cleavage energy barrier of ∼8–10 kcal mol−1. This substantially larger value compared with proton abstraction indicates that phosphate cleavage is rate-limiting. This is consistent with the proposed stabilization by Asn72 and/or Arg9 of the pentavalent intermediate (Fig. 2a), and MDS evidence pointing to Arg9-mediated stabilization.

## Additional information

**Accession codes**: Atomic coordinates and structure factors for Δ4-99MAG-ACP, Δ4-99MAG, Δ7-79MAG-FEL and Δ7-79MAG are deposited in the Protein Data Bank under accession codes 4UXX, 4UXW, 4UYO and 4UXZ, respectively.

**How to cite this article:** Li, D. *et al*. Ternary structure reveals mechanism of a membrane diacylglycerol kinase. *Nat. Commun.* 6:10140 doi: 10.1038/ncomms10140 (2015).

## Accession codes

### Accessions

#### Protein Data Bank

- 4UXW
- 4UXX
- 4UXZ
- 4UYO

## References

1. Van Horn, W. D. & Sanders, C. R. Prokaryotic diacylglycerol kinase and undecaprenol kinase. *Annu. Rev. Biophys.* **41**, 81–101 (2012).

   Article 
   CAS 
   Google Scholar
2. Badola, P. & Sanders, C. R. Escherichia coli diacylglycerol kinase is an evolutionarily optimized membrane enzyme and catalyzes direct phosphoryl transfer. *J. Biol. Chem.* **272**, 24176–24182 (1997).

   Article 
   CAS 
   Google Scholar
3. Lau, F. W., Chen, X. & Bowie, J. U. Active sites of diacylglycerol kinase from Escherichia coli are shared between subunits. *Biochemistry* **38**, 5521–5527 (1999).

   Article 
   CAS 
   Google Scholar
4. Mi, D., Kim, H. J., Hadziselimovic, A. & Sanders, C. R. Irreversible misfolding of diacylglycerol kinase is independent of aggregation and occurs prior to trimerization and membrane association. *Biochemistry* **45**, 10072–10084 (2006).

   Article 
   CAS 
   Google Scholar
5. Sanders, C. R. et al. Escherichia coli diacylglycerol kinase is an alpha-helical polytopic membrane protein and can spontaneously insert into preformed lipid vesicles. *Biochemistry* **35**, 8610–8618 (1996).

   Article 
   CAS 
   Google Scholar
6. Li, D. & Caffrey, M. Renaturing membrane proteins in the lipid cubic phase, a nanoporous membrane mimetic. *Sci. Rep.* **4**, 5806 (2014).

   Article 
   ADS 
   CAS 
   Google Scholar
7. Nagy, J. K., Lau, F. W., Bowie, J. U. & Sanders, C. R. Mapping the oligomeric interface of diacylglycerol kinase by engineered thiol cross-linking: homologous sites in the transmembrane domain. *Biochemistry* **39**, 4154–4164 (2000).

   Article 
   CAS 
   Google Scholar
8. Smith, R. L., O'Toole, J. F., Maguire, M. E. & Sanders, C. R. Membrane topology of Escherichia coli diacylglycerol kinase. *J. Bacteriol.* **176**, 5459–5465 (1994).

   Article 
   CAS 
   Google Scholar
9. Wen, J., Chen, X. & Bowie, J. U. Exploring the allowed sequence space of a membrane protein. *Nat. Struct. Biol.* **3**, 141–148 (1996).

   Article 
   CAS 
   Google Scholar
10. Zhou, Y. & Bowie, J. U. Building a thermostable membrane protein. *J. Biol. Chem.* **275**, 6975–6979 (2000).

    Article 
    CAS 
    Google Scholar
11. Lau, F. W., Nauli, S., Zhou, Y. & Bowie, J. U. Changing single side-chains can greatly enhance the resistance of a membrane protein to irreversible inactivation. *J. Mol. Biol.* **290**, 559–564 (1999).

    Article 
    CAS 
    Google Scholar
12. Li, D. et al. Crystal structure of the integral membrane diacylglycerol kinase. *Nature* **497**, 521–524 (2013).

    Article 
    ADS 
    CAS 
    Google Scholar
13. Van Horn, W. D. et al. Solution nuclear magnetic resonance structure of membrane-integral diacylglycerol kinase. *Science* **324**, 1726–1729 (2009).

    Article 
    ADS 
    CAS 
    Google Scholar
14. Li, D., Shah, S. T. & Caffrey, M. Host lipid and temperature as important screening variables for crystallizing integral membrane proteins in lipidic mesophases. trials with diacylglycerol kinase. *Cryst. Growth Des.* **13**, 2846–2857 (2013).

    Article 
    CAS 
    Google Scholar
15. Li, D. & Caffrey, M. Lipid cubic phase as a membrane mimetic for integral membrane protein enzymes. *Proc. Natl Acad. Sci. USA* **108**, 8639–8644 (2011).

    Article 
    ADS 
    CAS 
    Google Scholar
16. Walsh, J. P. & Bell, R. M. sn-1,2-Diacylglycerol kinase of Escherichia coli. Mixed micellar analysis of the phospholipid cofactor requirement and divalent cation dependence. *J. Biol. Chem.* **261**, 6239–6247 (1986).

    CAS 
    PubMed 
    Google Scholar
17. Boland, C. et al. Cell-free expression and in meso crystallisation of an integral membrane kinase for structure determination. *Cell. Mol. Life Sci.* **71**, 4835–4910 (2014).

    Article 
    Google Scholar
18. Burmeister, W. P. Structural changes in a cryo-cooled protein crystal owing to radiation damage. *Acta Crystallogr. D Biol. Crystallogr.* **56**, 328–341 (2000).

    Article 
    CAS 
    Google Scholar
19. Fraser, J. S. et al. Accessing protein conformational ensembles using room-temperature X-ray crystallography. *Proc. Natl Acad. Sci. USA* **108**, 16247–16252 (2011).

    Article 
    ADS 
    CAS 
    Google Scholar
20. Halle, B. Biomolecular cryocrystallography: structural changes during flash-cooling. *Proc. Natl Acad. Sci. USA* **101**, 4793–4798 (2004).

    Article 
    ADS 
    CAS 
    Google Scholar
21. Chapman, H. N. et al. Femtosecond X-ray protein nanocrystallography. *Nature* **470**, 73–77 (2011).

    Article 
    ADS 
    CAS 
    Google Scholar
22. Spence, J. C., Weierstall, U. & Chapman, H. N. X-ray lasers for structural and dynamic biology. *Rep. Prog. Phys.* **75**, 102601 (2012).

    Article 
    ADS 
    CAS 
    Google Scholar
23. Chapman, H. N., Caleman, C. & Timneanu, N. Diffraction before destruction. *Philos. Trans. R. Soc. Lond. B Biol. Sci.* **369**, 20130313 (2014).

    Article 
    Google Scholar
24. Endicott, J. A., Noble, M. E. & Johnson, L. N. The structural basis for control of eukaryotic protein kinases. *Annu. Rev. Biochem.* **81**, 587–613 (2012).

    Article 
    CAS 
    Google Scholar
25. Zheng, J. et al. 2.2 A refined crystal structure of the catalytic subunit of cAMP-dependent protein kinase complexed with MnATP and a peptide inhibitor. *Acta Crystallogr. D Biol. Crystallogr.* **49**, 362–365 (1993).

    Article 
    CAS 
    Google Scholar
26. Li, D., Boland, C., Aragao, D., Walsh, K. & Caffrey, M. Harvesting and cryo-cooling crystals of membrane proteins grown in lipidic mesophases for structure determination by macromolecular crystallography. *J. Vis. Exp.* **67**, e4001 (2012).

    Google Scholar
27. Weierstall, U. et al. Lipidic cubic phase injector facilitates membrane protein serial femtosecond crystallography. *Nat. Commun.* **5**, 3309 (2014).

    Article 
    Google Scholar
28. Caffrey, M., Li, D., Howe, N. & Shah, S. T. 'Hit and run' serial femtosecond crystallography of a membrane kinase in the lipid cubic phase. *Philos. Trans. R. Soc. Lond. B Biol. Sci.* **369**, 20130621 (2014).

    Article 
    Google Scholar
29. Liu, W., Ishchenko, A. & Cherezov, V. Preparation of microcrystals in lipidic cubic phase for serial femtosecond crystallography. *Nat. Protoc.* **9**, 2123–2134 (2014).

    Article 
    CAS 
    Google Scholar
30. Winter, G., Lobley, C. M. & Prince, S. M. Decision making in xia2. *Acta Crystallogr. D Biol. Crystallogr.* **69**, 1260–1273 (2013).

    Article 
    CAS 
    Google Scholar
31. Kabsch, W. Xds. *Acta Crystallogr. D Biol. Crystallogr.* **66**, 125–132 (2010).

    Article 
    CAS 
    Google Scholar
32. Boutet, S. & Williams, G. J. The Coherent X-ray Imaging (CXI) instrument at the Linac Coherent Light Source (LCLS). *New J. Phys.* **12**, 035024 (2010).

    Article 
    ADS 
    Google Scholar
33. Liu, W. et al. Serial femtosecond crystallography of G protein-coupled receptors. *Science* **342**, 1521–1524 (2013).

    Article 
    ADS 
    CAS 
    Google Scholar
34. Herrmann, S. et al. CSPAD-140k: a versatile detector for LCLS experiments. *Nucl. Instr. Meth. Phys. Res* **718**, 550–553 (2013).

    Article 
    ADS 
    CAS 
    Google Scholar
35. Barty, A. et al. Cheetah: software for high-throughput reduction and analysis of serial femtosecond X-ray diffraction data. *J. Appl. Crystallogr.* **47**, 1118–1131 (2014).

    Article 
    CAS 
    Google Scholar
36. White, T. A. et al. CrystFEL: a software suite for snapshot serial crystallography. *J. Appl. Crystallogr.* **45**, 335–341 (2012).

    Article 
    CAS 
    Google Scholar
37. Karplus, P. A. & Diederichs, K. Linking crystallographic model and data quality. *Science* **336**, 1030–1033 (2012).

    Article 
    ADS 
    CAS 
    Google Scholar
38. McCoy, A. J. et al. Phaser crystallographic software. *J. Appl. Crystallogr.* **40**, 658–674 (2007).

    Article 
    CAS 
    Google Scholar
39. Emsley, P. & Cowtan, K. Coot: model-building tools for molecular graphics. *Acta Crystallogr. D Biol. Crystallogr.* **60**, 2126–2132 (2004).

    Article 
    Google Scholar
40. Adams, P. D. et al. PHENIX: a comprehensive Python-based system for macromolecular structure solution. *Acta Crystallogr. D Biol. Crystallogr.* **66**, 213–221 (2010).

    Article 
    CAS 
    Google Scholar
41. Afonine, P. V. et al. FEM: feature-enhanced map. *Acta Crystallogr. D Biol. Crystallogr.* **71**, 646–666 (2015).

    Article 
    CAS 
    Google Scholar
42. Lang, P. T., Holton, J. M., Fraser, J. S. & Alber, T. Protein structural ensembles are revealed by redefining X-ray electron density noise. *Proc. Natl Acad. Sci. USA* **111**, 237–242 (2014).

    Article 
    ADS 
    CAS 
    Google Scholar
43. Pronk, S. et al. GROMACS 4.5: a high-throughput and highly parallel open source molecular simulation toolkit. *Bioinformatics* **29**, 845–854 (2013).

    Article 
    CAS 
    Google Scholar
44. Stansfeld, P. J., Jefferys, E. E. & Sansom, M. S. Multiscale simulations reveal conserved patterns of lipid interactions with aquaporins. *Structure* **21**, 810–819 (2013).

    Article 
    CAS 
    Google Scholar
45. Stansfeld, P. J. & Sansom, M. S. P. From coarse grained to atomistic: a serial multiscale approach to membrane protein simulations. *J. Chem. Theory Comput.* **7**, 1157–1166 (2011).

    Article 
    CAS 
    Google Scholar
46. Oostenbrink, C., Villa, A., Mark, A. E. & van Gunsteren, W. F. A biomolecular force field based on the free enthalpy of hydration and solvation: the GROMOS force-field parameter sets 53A5 and 53A6. *J. Comput. Chem.* **25**, 1656–1676 (2004).

    Article 
    CAS 
    Google Scholar
47. Vreven, T., Morokuma, K., Farkas, O., Schlegel, H. B. & Frisch, M. J. Geometry optimization with QM/MM, ONIOM, and other combined methods. I. Microiterations and constraints. *J. Comput. Chem.* **24**, 760–769 (2003).

    Article 
    CAS 
    Google Scholar
48. Harrison, C. B. & Schulten, K. Quantum and classical dynamics simulations of ATP hydrolysis in solution. *J. Chem. Theory Comput.* **8**, 2328–2335 (2012).

    Article 
    CAS 
    Google Scholar

Download references

## Acknowledgements

The work was supported by Science Foundation Ireland grant 12/IA/1255 (M.C.) and 07/SRC/B1160 (J.M.D. MacElroy), the National Institutes of Health Common Fund in Structural Biology grants P50 GM073210 (M.C.), R01 GM095583 (P.F.) and R01 GM108635 (V.C.); National Institute of General Medical Sciences GM75915 (M.C.) and U54 GM094599 (P.F.); and NSF Science and Technology Center award 1231306 (J.C.H.Spence). P.J.S. is supported by BBSRC grant BB/I019855/1. Work in MSPS’s lab is supported by the Wellcome Trust. C.G. kindly thanks the PIER Helmholtz Graduate School and the Helmholtz Association for financial support. All MD and most DFT simulations were performed using Irish Centre for High-End Computing (ICHEC) facilities, and we thank M. Peters for assistance. We thank C. R. Sanders for providing *E. coli* strain WH1061. The assistance and support of beamline scientists at the Advanced Photon Source (23-ID), Diamond Light Source (I24), Swiss Light Source (PXII) and LCLS, a National User Facility operated by Stanford University on behalf of the U.S. Department of Energy, Office of Basic Energy Sciences. We thank V. Pye for help with diffraction data collection and preliminary analysis, S. Knapp for advice on kinases, J. Holton for advice on data analysis, and S. Shah for lipid synthesis. J. Spence, E. Xu and R. Stevens are thanked for their encouragement and support.

## Author information

Author notes

1. Dianfan Li

   Present address: Present address: National Center for Protein Sciences, State Key Laboratory of Molecular Biology, Institute of Biochemistry and Cell Biology, Shanghai Institutes for Biological Sciences, Chinese Academy of Sciences, Shanghai 201210, China,
2. Joseph A. Lyons

   Present address: Present address: Department of Molecular Biology and Genetics, Aarhus University, Aarhus 8000, Denmark,
3. David Aragao

   Present address: Present address: Australian Synchrotron, 800 Blackburn Road, Clayton, Victoria VIC 3168, Australia,
4. Marc Messerschmidt

   Present address: Present address: BioXFEL STC, 700 Ellicott Street, Buffalo, New York 14203, USA,
5. M. Marvin Seibert

   Present address: Present address: Department of Cell and Molecular Biology, Uppsala University, Husargatan 3, Box 596, SE-751 24 Uppsala, Sweden,

### Authors and Affiliations

1. School of Medicine and School of Biochemistry and Immunology, Trinity College Dublin, Dublin 2, Ireland

   Dianfan Li, Aaron Keogh, Lutz Vogeley, Nicole Howe, Joseph A. Lyons, David Aragao & Martin Caffrey
2. Department of Biochemistry, University of Oxford, South Parks Road, Oxford, OX1 3QU, UK

   Phillip J. Stansfeld & Mark S. P. Sansom
3. School of Molecular Sciences and Center for Applied Structural Discovery at the Biodesign Institute, Arizona State University, Tempe, 85287, Arizona, USA

   Petra Fromme, Raimund Fromme, Shibom Basu, Ingo Grotjohann, Christopher Kupitz, Kimberley Rendek & Wei Liu
4. Department of Physics, Arizona State University, Tempe, 85287, Arizona, USA

   Uwe Weierstall & Nadia A. Zatsepin
5. Department of Chemistry, Bridge Institute, University of Southern California, Los Angeles, 90089, California, USA

   Vadim Cherezov
6. SFI Strategic Research Cluster in Solar Energy Conversion, School of Chemical and Bioprocess Engineering, University College Dublin, Belfield, Dublin 4, Ireland

   Sateesh Bandaru & Niall J. English
7. Center for Free Electron Laser Science, Deutsches Elektronen-Synchrotron, Hamburg, 22607, Germany

   Cornelius Gati, Anton Barty, Oleksandr Yefanov & Henry N. Chapman
8. Department of Physics, University of Hamburg, Hamburg, 22761, Germany

   Henry N. Chapman
9. Department of Biology, University of Konstanz, Box 647, Konstanz, D-78457, Germany

   Kay Diederichs
10. Linac Coherent Light Source (LCLS), SLAC National Accelerator Laboratory, 2575 Sand Hill Road, Menlo Park, 94025, California, USA

    Marc Messerschmidt, Sébastien Boutet, Garth J. Williams & M. Marvin Seibert

Authors

1. Dianfan Li

   View author publications

   You can also search for this author in
   PubMed Google Scholar
2. Phillip J. Stansfeld

   View author publications

   You can also search for this author in
   PubMed Google Scholar
3. Mark S. P. Sansom

   View author publications

   You can also search for this author in
   PubMed Google Scholar
4. Aaron Keogh

   View author publications

   You can also search for this author in
   PubMed Google Scholar
5. Lutz Vogeley

   View author publications

   You can also search for this author in
   PubMed Google Scholar
6. Nicole Howe

   View author publications

   You can also search for this author in
   PubMed Google Scholar
7. Joseph A. Lyons

   View author publications

   You can also search for this author in
   PubMed Google Scholar
8. David Aragao

   View author publications

   You can also search for this author in
   PubMed Google Scholar
9. Petra Fromme

   View author publications

   You can also search for this author in
   PubMed Google Scholar
10. Raimund Fromme

    View author publications

    You can also search for this author in
    PubMed Google Scholar
11. Shibom Basu

    View author publications

    You can also search for this author in
    PubMed Google Scholar
12. Ingo Grotjohann

    View author publications

    You can also search for this author in
    PubMed Google Scholar
13. Christopher Kupitz

    View author publications

    You can also search for this author in
    PubMed Google Scholar
14. Kimberley Rendek

    View author publications

    You can also search for this author in
    PubMed Google Scholar
15. Uwe Weierstall

    View author publications

    You can also search for this author in
    PubMed Google Scholar
16. Nadia A. Zatsepin

    View author publications

    You can also search for this author in
    PubMed Google Scholar
17. Vadim Cherezov

    View author publications

    You can also search for this author in
    PubMed Google Scholar
18. Wei Liu

    View author publications

    You can also search for this author in
    PubMed Google Scholar
19. Sateesh Bandaru

    View author publications

    You can also search for this author in
    PubMed Google Scholar
20. Niall J. English

    View author publications

    You can also search for this author in
    PubMed Google Scholar
21. Cornelius Gati

    View author publications

    You can also search for this author in
    PubMed Google Scholar
22. Anton Barty

    View author publications

    You can also search for this author in
    PubMed Google Scholar
23. Oleksandr Yefanov

    View author publications

    You can also search for this author in
    PubMed Google Scholar
24. Henry N. Chapman

    View author publications

    You can also search for this author in
    PubMed Google Scholar
25. Kay Diederichs

    View author publications

    You can also search for this author in
    PubMed Google Scholar
26. Marc Messerschmidt

    View author publications

    You can also search for this author in
    PubMed Google Scholar
27. Sébastien Boutet

    View author publications

    You can also search for this author in
    PubMed Google Scholar
28. Garth J. Williams

    View author publications

    You can also search for this author in
    PubMed Google Scholar
29. M. Marvin Seibert

    View author publications

    You can also search for this author in
    PubMed Google Scholar
30. Martin Caffrey

    View author publications

    You can also search for this author in
    PubMed Google Scholar

### Contributions

D.L. designed experiments, and produced, purified, crystallized and functionally characterized the protein and its variants, collected and processed synchrotron diffraction data, refined and analysed the structures and wrote the manuscript. N.H. assisted with the production and characterization of mutants. A.K. helped with the catalytic mechanism. L.V. contributed toward data processing and structure solution and analysis. J.A.L, D.A. and K.D. advised on data analysis. P.J.S. and M.S.P.S were responsible for MDS. S.B. and N.J.E. performed DFT. V.C. developed the LCP-SFX approach and supervised the XFEL beamline at LCLS (L672). U.W. conceived, designed and developed the LCP injector. R.F., S.B., M.M., G.J.W. and M.M.S. set-up the XFEL experiment, beamline, controls and data acquisition, operated the CXI beamline and performed the data collection. W.L. helped with XFEL sample preparation and participated in LCP-SFX data collection. P.F., R.F., S.B., N.A.Z., I.G., C.K., K.R., C.G, A.B. and O.Y. participated in LCP-SFX data collection, analysis and processing. H.N.C. supervised software development and data processing. M.C. was responsible for the overall project strategy and management and wrote the manuscript. Edits were provided by V.C., K.D., P.F., N.J.E., and P.J.S.

### Corresponding author

Correspondence to
Martin Caffrey.

## Ethics declarations

### Competing interests

The authors declare no competing financial interests.

## Supplementary information

### Supplementary Information

Supplementary Figures 1-8, Supplementary Table 1 and Supplementary References. (PDF 1943 kb)

### Supplementary Movie 1

DgkA MD Simulations. a, DgkA trimer in a lipid bilayer. ATP and MAG1 shown as yellow spheres. Zinc ions shown as grey spheres. Phosphate lipid head group atoms shown as orange spheres. b, Focus on the ATP binding site. ATP and residues E28, N72, E76, E85, H87, K94 and D95 shown as sticks. The stability of the dynamics highlights the high fidelity of the crystal structure coordinates. c, Simulations with ADP and LPA, shown as sticks. The Zn1 ion moves to bridge the α- and β-phosphates of ADP. This slightly repositions the ADP molecule, so that K94 interacts with both α- and β-phosphates. The relocation removes the K94 hydrogen bond with N7 and thus the adenine ring is more likely to move, breaking the hydrogen bonds with E85 and H87. Once free, the enhanced adenine dynamics ruptures the hydrogen bonds with D95, leaving only interactions between Zn1 and K94 and the two remaining phosphates. Zn2 bridges the β-phosphate of ADP and the phosphate of LPA in this state. (MOV 25643 kb)

### Supplementary Movie 2

DgkA Mutant MD Simulations. In each case, the mutated residue is identifiable by a black sphere. a, E28A. In the simulations, the zinc-ATP complex moves towards the cytoplasm, away from the membrane and the MAG1 head group. Loss of the E28 side chain is likely to affect the binding of Zn2 in the absence of ATP. b, E76A. To compensate for the loss of E76, the zinc-ATP complex moves towards the membrane, so that E69 can fulfil the role of E76 in coordinating the two zinc ions. c, G83P. The proline mutation (spheres) appears to destabilise the CL, breaking the hydrogen bonds between the adenine ring and E85 and H87. d, K94A. This mutation rapidly destabilises both the adenine ring and α-phosphate of ATP due to loss of hydrogen bonds. As a result, the head group of ATP flips out of the binding site. (MOV 20236 kb)

## Rights and permissions

This work is licensed under a Creative Commons Attribution 4.0 International License. The images or other third party material in this article are included in the article’s Creative Commons license, unless indicated otherwise in the credit line; if the material is not included under the Creative Commons license, users will need to obtain permission from the license holder to reproduce the material. To view a copy of this license, visit http://creativecommons.org/licenses/by/4.0/

Reprints and permissions

## About this article

### Cite this article

Li, D., Stansfeld, P., Sansom, M. *et al.* Ternary structure reveals mechanism of a membrane diacylglycerol kinase.
*Nat Commun* **6**, 10140 (2015). https://doi.org/10.1038/ncomms10140

Download citation

- Received: 25 April 2015
- Accepted: 09 November 2015
- Published: 17 December 2015
- DOI: https://doi.org/10.1038/ncomms10140

### Share this article

Anyone you share the following link with will be able to read this content:

Get shareable link

Sorry, a shareable link is not currently available for this article.

Copy to clipboard

Provided by the Springer Nature SharedIt content-sharing initiative

## This article is cited by

- ### Structure of membrane diacylglycerol kinase in lipid bilayers

  - Jianping Li
  - Yang Shen
  - Jun Yang

  *Communications Biology* (2021)
- ### Global response of diacylglycerol kinase towards substrate binding observed by 2D and 3D MAS NMR

  - Kristin Möbius
  - Sina Kazemi
  - Clemens Glaubitz

  *Scientific Reports* (2019)
- ### Crystal structure of undecaprenyl-pyrophosphate phosphatase and its role in peptidoglycan biosynthesis

  - Meriem El Ghachi
  - Nicole Howe
  - Martin Caffrey

  *Nature Communications* (2018)
- ### Lipidic cubic phase injector is a viable crystal delivery system for time-resolved serial crystallography

  - Przemyslaw Nogly
  - Valerie Panneels
  - Jörg Standfuss

  *Nature Communications* (2016)

## Comments

By submitting a comment you agree to abide by our Terms and Community Guidelines. If you find something abusive or that does not comply with our terms or guidelines please flag it as inappropriate.


Download PDF

## Associated content

Collection

### Free-Electron Lasers

Advertisement

## Explore content

- Research articles
- Reviews & Analysis
- News & Comment
- Videos
- Collections
- Subjects

- Follow us on Facebook
- Follow us on Twitter
- Sign up for alerts
- RSS feed


## About the journal

- Aims & Scope
- Editors
- Journal Information
- Open Access Fees and Funding
- Calls for Papers
- Editorial Values Statement
- Journal Metrics
- Editors' Highlights
- Contact
- Editorial policies
- Top Articles


## Publish with us

- For authors
- For Reviewers
- Language editing services
- Submit manuscript

## Search

Search articles by subject, keyword or author

Show results from

All journals
This journal

Search

Advanced search

### Quick links

- Explore articles by subject
- Find a job
- Guide to authors
- Editorial policies

Nature Communications (*Nat Commun*)

ISSN 2041-1723 (online)

## nature.com sitemap

### About Nature Portfolio

- About us
- Press releases
- Press office
- Contact us

### Discover content

- Journals A-Z
- Articles by subject
- protocols.io
- Nature Index

### Publishing policies

- Nature portfolio policies
- Open access

### Author & Researcher services

- Reprints & permissions
- Research data
- Language editing
- Scientific editing
- Nature Masterclasses
- Research Solutions

### Libraries & institutions

- Librarian service & tools
- Librarian portal
- Open research
- Recommend to library

### Advertising & partnerships

- Advertising
- Partnerships & Services
- Media kits
- Branded
  content

### Professional development

- Nature Careers
- Nature 
  Conferences

### Regional websites

- Nature Africa
- Nature China
- Nature India
- Nature Italy
- Nature Japan
- Nature Middle East

- Privacy
  Policy
- Use
  of cookies
- Your privacy choices/Manage cookies
- Legal
  notice
- Accessibility
  statement
- Terms & Conditions
- Your US state privacy rights

© 2024 Springer Nature Limited

xml version="1.0" encoding="UTF-8"?

Close banner

Close

Sign up for the *Nature Briefing* newsletter — what matters in science, free to your inbox daily.

Email address

Sign up

I agree my information will be processed in accordance with the *Nature* and Springer Nature Limited Privacy Policy.

Close banner

Close

Get the most important science stories of the day, free in your inbox.
Sign up for Nature Briefing
